# Supplementary material
Source: PubMed Central journal article supplement (PMC5033817)
Supplement: jciinsight-1-85562-s001.pdf [file jciinsight-1-85562-s001.pdf]

669 **Supplemental Figures and Tables**  
 670  
 671

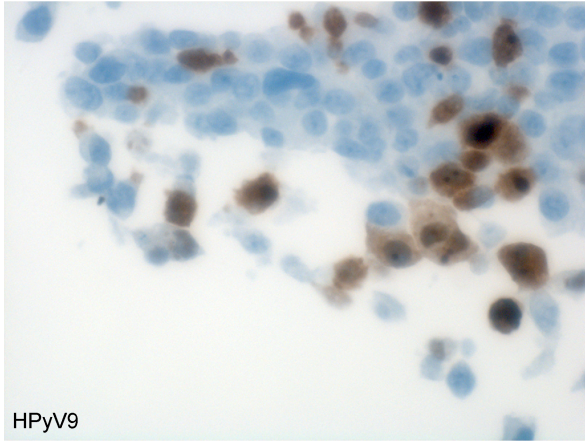

673  
 674 **Supplemental Figure S1, Relevant to Figure 2.** 40x magnification of pan-HPyV staining  
 675 of HPyV9 T antigen expression in HEK293 cells showing nuclear as well as cytoplasmic  
 676 T antigen localization.

677  
 678 **TABLE S1: Primers for human polyomaviruses**

| HPyV             | Primer Name | Sequence                    | Ref. |
|------------------|-------------|-----------------------------|------|
| JCV, BKV (Outer) | P-3         | GTATACACAGCAAAGGAAGC        | (1)  |
|                  | P-4         | GCTCATCAGCCTGATTTTGG        |      |
| JCV, BKV (Inner) | P-1         | AGTCTTTAGGGTCTTCTACC        | (1)  |
|                  | P-2         | GGTGCCAACCTATGGAACAG        |      |
| KIV, WUV         | KIV/WUV.F   | TTGGATGAAAATGGCATTGG        | (1)  |
|                  | KIV/WUV.R   | TAACCCTTCTTTGTCTAAAATGTAGCC |      |
| MCV              | MCV.F       | GGAATTGAACACCCTTTGGA        | (2)  |
|                  | MCV.R       | CTACAATGCTGGCGAGACAA        |      |
| HPyV6            | HPyV6.F     | GGCATTTCAGGAACTGATT         | (2)  |
|                  | HPyV6.R     | AAGTTGAATGCCACCCTGAG        |      |
| HPyV7            | HPyV7.F     | AAACTCTGGCCCCAAAACT         | (2)  |
|                  | HPyV7.R     | GAGATCCCCAGAAAATGCAA        |      |
| TSV              | TSV.F       | TGAAGGCCTATTTTGCAGGT        | (2)  |
|                  | TSV.R       | AGCCAGGTAGGCTCATGGTA        |      |
| HPyV9            | HPyV9.F     | AGAGGCGCAGCAAACCTAAA        | (2)  |
|                  | HPyV9.R     | TGGTGGATATCCTGATTGCAT       |      |

|                |             |                              |     |
|----------------|-------------|------------------------------|-----|
| HPyV10, HPyV11 | MW/STLPyV.F | GRATGAAAYRCWWTTACAGGTTGCCACC | (3) |
|                | MW/STLPyV.R | GTGGWAAAACAACCTGTAGCWGCTGC   |     |
| HPyV12         | HPyV12.F    | GTGGGAAGCTGTCAGTGTGA         | (4) |
|                | HPyV12.R    | CCACCTACTGCAAACATGTG         |     |
| NJPyV          | NJPyV.F     | AGAATGGAGTAGGCCCTCTGT        | (5) |
|                | NJPyV.R     | GCTCTGTTAGCACTTCTGTCC        |     |

679

680 **TABLE S2: Primers for sequencing complete WUV genome**

681

|          | Primer Name | Sequence                |
|----------|-------------|-------------------------|
| Contig 1 | WU 1F       | TGCCTTCTTTAGCCTCAAGG    |
|          | WU 2R       | TAAGCCCACCAAGAGCAG      |
| Contig 2 | WU 3F       | AGAGGCACTATCAATTGCTGG   |
|          | WU 4R       | TCCCTTGAAGGGTAGAAGC     |
| Contig 3 | WU5F        | AGCTGTAAGACATGCAACTC    |
|          | WU 6R       | ATTAGTGACCCTTGCCCTG     |
| Contig 4 | WU 7F       | AATACAAGGGGCTGCTCAG     |
|          | WU 8R       | TCCCTGCTACTTTGGCTCC     |
| Contig 5 | WU 9F       | TCAGCAAATTCAGTAAGGCC    |
|          | WU 10R      | TCAACAGGCTATTGATGTGG    |
| Contig 6 | WU 11F      | TCTAGCTAATAAACCTTCTCTGG |
|          | WU 12R      | TGAGGAACCACAATGTTTAC    |
| Contig 7 | WU 13F      | ATGCATCTGTAGCATTGTCC    |
|          | WU 14R      | TAAAAGCAGAGGGCCTTGC     |

682

## 683 **References**

- 684 1. Giraud G, Ramqvist T, Ragnarsson-Olding B, Dalianis T. DNA from BK virus  
685 and JC virus and from KI, WU, and MC polyomaviruses as well as from simian

- 686 virus 40 is not detected in non-UV-light-associated primary malignant melanomas  
687 of mucous membranes. *J Clin Microbiol.* 2008;46(11):3595–8.
- 688 2. Ho J, et al. Human Polyomavirus 7-Associated Pruritic Rash and Viremia in  
689 Transplant Recipients. *J Infect Dis.* 2015;(211): 1560-6.
- 690 3. Lim ES, et al. Discovery of STL polyomavirus, a polyomavirus of ancestral  
691 recombinant origin that encodes a unique T antigen by alternative splicing.  
692 *Virology.* 2013;436(2):295–303.
- 693 4. Korup S, et al. Identification of a Novel Human Polyomavirus in Organs of the  
694 Gastrointestinal Tract. *PLoS One.* 2013;8(3).
- 695 5. Mishra N, et al. Identification of a novel polyomavirus in a pancreatic transplant  
696 recipient with retinal blindness and vasculitic myopathy. *J Infect Dis.*  
697 2014;210(10):1595-9.
- 698  
699
